# Supplementary material for: Comparative Genomic Analysis of Malaria Mosquito Vector-Associated Novel Pathogen Elizabethkingia anophelis
Source: PubMed Central journal article supplement — Genome Biol Evol. 2014 May 6;6(5):1158–65. doi: 10.1093/gbe/evu094 (PMC4041001; doi:10.1093/gbe/evu094), 2014-05-06
Supplement: supp_evu094_Table_S1.pdf [file supp_evu094_Table_S1.pdf]

**Comparative genomic analysis of malaria mosquito vector associated novel  
pathogen *Elizabethkingia anophelis***

Jeanette Teo<sup>1¶</sup>, Sean Yang-Yi Tan<sup>2,3¶</sup>, Yang Liu<sup>2</sup>, Martin Tay<sup>2,3</sup>, Yichen Ding<sup>2</sup>, Yingying Li<sup>3</sup>, Staffan Kjelleberg<sup>2,4</sup>, Michael Givskov<sup>2,5</sup>, Raymond T.P. Lin<sup>1</sup>, Liang Yang<sup>2,3\*</sup>

**Table S1.** General characteristics of the seven *Elizabethkingia spp.* strains from this study: three patient isolates (NUHP1, NUHP2 and NUHP3) and four sink isolates (NUH1, NUH4, NUH6 and NUH11). Values obtained from the RAST annotation server(Aziz, et al. 2008).

| Characteristics         | <i>Elizabethkingia spp.</i> strains |           |           |           |           |           |           |
|-------------------------|-------------------------------------|-----------|-----------|-----------|-----------|-----------|-----------|
|                         | NUHP1                               | NUHP2     | NUHP3     | NUH1      | NUH4      | NUH6      | NUH11     |
| Genome                  |                                     |           |           |           |           |           |           |
| Size (bp)               | 4,337,802                           | 4,334,646 | 4,334,105 | 4,334,661 | 4,239,486 | 4,123,800 | 4,091,484 |
| No. of contigs          | 65                                  | 59        | 71        | 59        | 50        | 74        | 59        |
| GC content (%)          | 35.6                                | 35.6      | 35.5      | 35.6      | 35.6      | 35.6      | 35.6      |
| No. of coding sequences | 4054                                | 4046      | 4063      | 4060      | 3971      | 3870      | 3826      |
| No. of subsystems       | 330                                 | 329       | 329       | 329       | 329       | 327       | 328       |
| No. of RNAs             | 48                                  | 46        | 47        | 48        | 48        | 48        | 50        |

**Table S2.** General characteristics of *E. anophelis* strains Ag1 and R26, and *E. meningoseptica* NBRC 12535. Values obtained from the RAST annotation server (Aziz, et al. 2008).

| Characteristics         | <i>E. anophelis</i> | <i>E. anophelis</i> | <i>E. meningoseptica</i> | <i>E. meningoseptica</i> | <i>E. meningoseptica</i> |
|-------------------------|---------------------|---------------------|--------------------------|--------------------------|--------------------------|
|                         | Ag1                 | R26                 | ATCC13253(NITE)          | ATCC13253(OSU)           | 502                      |
| Genome                  |                     |                     |                          |                          |                          |
| Size (bp)               | 4,045,712           | 4,032,720           | 3,840,286                | 3,796,928                | 3,960,658                |
| No. of contigs          | 51                  | 66                  | 34                       | 115                      | 21                       |
| GC content (%)          | 35.5                | 35.4                | 36.4                     | 36.6                     | 35.5                     |
| No. of coding sequences | 3825                | 3759                | 3520                     | 3487                     | 3652                     |
| No. of subsystems       | 323                 | 321                 | 323                      | 323                      | 330                      |
| No. of RNAs             | 43                  | 40                  | 41                       | 48                       | 52                       |

**Table S3.** Proteins involved in virulence encoded from core- and accessory-genomes of the *Elizabethkingia spp.* identified by BLAST search against the Virulence Factors of Pathogenic bacteria Database (VFDB).

| <b>Database id</b> | <b>% Identity</b> | <b>Annotation</b>                                                              |
|--------------------|-------------------|--------------------------------------------------------------------------------|
| <b>core-genome</b> |                   |                                                                                |
| VFG0028            | 32.98             | (gi:33594368) brkB - serum resistance protein                                  |
| VFG0036            | 44.79             | (gi:33591349) bpIC - lipopolysaccharide biosynthesis protein                   |
| VFG0070            | 30.32             | (gi:16802625) iap - P60 extracellular protein, invasion associated protein iap |
| VFG0073            | 31.82             | (gi:16802247) plcA - phosphatidylinositol-specific phospholipase c             |
| VFG0077            | 52.08             | (gi:16804506) clpP - ATP-dependent Clp protease proteolytic subunit            |
| VFG0079            | 45.71             | (gi:16802278) clpC - endopeptidase Clp ATP-binding chain C                     |
| VFG0080            | 49.27             | (gi:16803037) clpE - ATP-dependent protease                                    |
| VFG0082            | 59.96             | (gi:15640836) aldA - aldehyde dehydrogenase                                    |
| VFG0087            | 43.83             | (gi:15640841) tagD - tagD protein                                              |
| VFG0101            | 36.51             | (gi:15640855) toxT - TCP pilus virulence regulatory protein                    |
| VFG0119            | 39.82             | (gi:15600454) algR - alginate biosynthesis regulatory protein AlgR             |
| VFG0120            | 33.85             | (gi:15600455) algZ - sigma factor AlgU                                         |
| VFG0122            | 33.7              | (gi:15598736) algD - GDP-mannose 6-dehydrogenase AlgD                          |
| VFG0130            | 31.66             | (gi:15598744) algI - alginate o-acetyltransferase AlgI                         |
| VFG0152            | 49.18             | (gi:15598673) rhIR - transcriptional regulator RhIR                            |
| VFG0160            | 31.61             | (gi:15597593) pvdE - pyoverdine biosynthesis protein PvdE                      |
| VFG0167            | 30.41             | (gi:15599423) pchR - transcriptional regulator PchR                            |
| VFG0168            | 34.04             | (gi:15599424) pchD - pyochelin biosynthesis protein PchD                       |
| VFG0307            | 30.22             | (gi:15644871) napA - neutrophil activating protein (napA) (bacterioferritin)   |

|         |       |                                                                                                               |
|---------|-------|---------------------------------------------------------------------------------------------------------------|
| VFG0313 | 38.96 | (gi:15645788) gluP - glucose/galactose transporter (gluP)                                                     |
| VFG0314 | 32.22 | (gi:15644988) gluE - UDP-glucose 4-epimerase                                                                  |
| VFG0320 | 44.3  | (gi:15646084) kdtB - lipopolysaccharide core biosynthesis protein (kdtB)                                      |
| VFG0321 | 32.73 | (gi:15644675) rfbD - GDP-D-mannose dehydratase (rfbD)                                                         |
| VFG0323 | 30.93 | (gi:15645486) lpxB - lipid A disaccharide synthetase (lpxB)                                                   |
| VFG0328 | 37.31 | (gi:16273439) lic1C - lic-1 operon protein (licC)                                                             |
| VFG0344 | 30.96 | (gi:16272073) hitC - iron(III) ABC transporter, ATP-binding protein                                           |
| VFG0358 | 32.39 | (gi:16122154) fyuA/psn - pesticin/yersiniabactin receptor protein                                             |
| VFG0366 | 39.5  | (gi:16122162) ybtQ - inner membrane ABC-transporter YbtQ                                                      |
| VFG0428 | 31.03 | (gi:16763118) tviE - Vi polysaccharide biosynthesis protein TviE, Glycosyl transferases group 1               |
| VFG0431 | 53.61 | (gi:16763123) tviB - Vi polysaccharide biosynthesis protein, UDP-glucose/GDP-mannose dehydrogenase            |
| VFG0478 | 30.88 | (gi:16764063) fur - transcriptional repressor of iron-responsive genes (Fur family) (ferric uptake regulator) |
| VFG0479 | 39.87 | (gi:16764728) pykF - pyruvate kinase I (formerly F), fructose stimulated                                      |
| VFG0483 | 34.9  | (gi:16764732) orf408 - putative regulatory protein, deoR family                                               |
| VFG0487 | 32.97 | (gi:16764736) ttrS - Tetrathionate reductase complex: sensory transduction histidine kinase                   |
| VFG0491 | 31.88 | (gi:16764740) orf242 - putative regulatory proteins, merR family                                              |
| VFG0492 | 30.05 | (gi:16764741) ssrB - Secretion system regulator: transcriptional activator, homologous with degU/uvrY/bvgA    |
| VFG0555 | 30.28 | (gi:16766200) invC - surface presentation of antigens; secretory proteins                                     |
| VFG0562 | 37.76 | (gi:16766215) mutS - methyl-directed mismatch repair, recognize exocyclic adducts of guanosine                |
| VFG0574 | 53.53 | (gi:16767047) mgtB - Mg <sup>2+</sup> transport protein                                                       |

|         |       |                                                                                                  |
|---------|-------|--------------------------------------------------------------------------------------------------|
| VFG0575 | 40.54 | (gi:16767048) mgtC - Mg <sup>2+</sup> transport protein                                          |
| VFG0576 | 42.57 | (gi:16767506) ssb - ssDNA-binding protein controls activity of RecBCD nuclease                   |
| VFG0585 | 33.33 | (gi:16767515) soxS - transcriptional activator of superoxide response regulon (AraC/XylS family) |
| VFG0596 | 42.67 | (gi:16764454) copR - Copper resistance; transcriptional regulatory protein                       |
| VFG0670 | 39.54 | (gi:24111748) gtrB - bactoprenol glucosyl transferase                                            |
| VFG0679 | 32.88 | (gi:6470206) dep/capD - $\gamma$ -glutamyltranspeptidase                                         |
| VFG0696 | 44.64 | (gi:30962644) bexA - ATP-dependent polysaccharide export protein                                 |
| VFG0841 | 35.33 | (gi:3822163) hlyB - hemolysin transport protein                                                  |
| VFG0864 | 31.76 | (gi:471302) aggR - AraC homologous regulator of AAF/I                                            |
| VFG0869 | 35.38 | (gi:34148232) aatC - AatC ATB binding protein of ABC transporter                                 |
| VFG0872 | 32.21 | (gi:26251200) fimE - Type 1 fimbriae Regulatory protein fimE                                     |
| VFG0916 | 34.23 | (gi:26250129) chuS - Putative heme/hemoglobin transport protein                                  |
| VFG0917 | 30.23 | (gi:26250130) chuA - Outer membrane heme/hemoglobin receptor                                     |
| VFG0922 | 37.82 | (gi:26250139) chuU - Putative permease of iron compound ABC transport system                     |
| VFG0923 | 30.81 | (gi:26246561) fepA - Ferrienterobactin receptor precursor                                        |
| VFG0925 | 31.8  | (gi:26246567) fepC - Ferric enterobactin transport ATP-binding protein fepC                      |
| VFG0934 | 33.33 | (gi:26246575) entA - 2,3-dihydro-2,3-dihydroxybenzoate dehydrogenase                             |
| VFG0937 | 31.75 | (gi:26249459) iucD - iucD protein                                                                |
| VFG1036 | 34.25 | (gi:15808716) tetA(B) - tetracycline resistance protein TetA(B)                                  |
| VFG1037 | 39.22 | (gi:15808717) tetC - putative transcriptional regulator TetC                                     |
| VFG1038 | 31.37 | (gi:15808718) tetD - putative transcriptional regulator TetD                                     |
| VFG1050 | 30.81 | (gi:15808730) orf34 - unknown                                                                    |
| VFG1066 | 42.59 | (gi:15808746) orf50 - unknown                                                                    |

|         |       |                                                                        |
|---------|-------|------------------------------------------------------------------------|
| VFG1085 | 41.43 | (gi:14626628) iutA - iutA                                              |
| VFG1105 | 37.88 | (gi:15641775) VC1772 - hypothetical protein                            |
| VFG1115 | 30.65 | (gi:15641785) nanK - ROK family protein                                |
| VFG1206 | 36.56 | (gi:15677997) fbpC - iron(III) ABC transporter, ATP-binding protein    |
| VFG1214 | 30.1  | (gi:15599743) pilR - two-component response regulator PilR             |
| VFG1225 | 37.31 | (gi:15595605) pilG - twitching motility protein PilG                   |
| VFG1226 | 33.33 | (gi:15595606) pilH - twitching motility protein PilH                   |
| VFG1234 | 35.64 | (gi:15595613) chpD - probable transcriptional regulator                |
| VFG1248 | 49.35 | (gi:15596294) fleQ - transcriptional regulator FleQ                    |
| VFG1266 | 34.38 | (gi:15599418) pchI - probable ATP-binding component of ABC transporter |
| VFG1269 | 33.81 | (gi:33591935) cyaB - cyclolysin secretion ATP-binding protein          |
| VFG1300 | 39.96 | (gi:21281856) cap8D - capsular polysaccharide synthesis enzyme Cap8D   |
| VFG1306 | 45.45 | (gi:21281862) cap8J - capsular polysaccharide synthesis enzyme Cap8J   |
| VFG1342 | 38.1  | (gi:22537323) cpsO - glycosyl transferase CpsO(V)                      |
| VFG1349 | 30.66 | (gi:22537330) cpsD - cpsD protein                                      |
| VFG1354 | 40.82 | (gi:15900810) cbpE - choline binding protein E                         |
| VFG1381 | 60.38 | (gi:15607608) icl/aceA - aceA                                          |
| VFG1390 | 36.77 | (gi:15608121) mprA - hypothetical protein Rv0981                       |
| VFG1394 | 38.25 | (gi:15608893) plcD - plcD                                              |
| VFG1395 | 34.29 | (gi:15608948) mgtC - mgtC                                              |
| VFG1398 | 32.89 | (gi:15609329) trpD - trpD                                              |
| VFG1404 | 34.36 | (gi:15609565) ahpC - ahpC                                              |
| VFG1406 | 35.34 | (gi:15609848) ideR - ideR                                              |
| VFG1408 | 30.08 | (gi:15610077) mas - mas                                                |

|         |       |                                                                               |
|---------|-------|-------------------------------------------------------------------------------|
| VFG1411 | 43.55 | (gi:15610124) leuD - leuD                                                     |
| VFG1412 | 31.82 | (gi:15610359) sigH - sigH                                                     |
| VFG1416 | 57.01 | (gi:15610737) panD - panD                                                     |
| VFG1417 | 40.7  | (gi:15610738) panC - panC                                                     |
| VFG1444 | 30.99 | (gi:9965749) asIA - putative arylsulfatase                                    |
| VFG1449 | 43.28 | (gi:146567) kpsT - KpsT                                                       |
| VFG1486 | 34.07 | (gi:24528017) ORF35 - putative CS12 fimbrial-like upstream regulatory protein |
| VFG1557 | 35.56 | (gi:23954241) hlyB - HlyB protein                                             |
| VFG1584 | 32.12 | (gi:23954267) orf50 - hypothetical protein                                    |
| VFG1587 | 45.05 | (gi:23954270) orf53 - hypothetical protein                                    |
| VFG1633 | 31.1  | (gi:14594867) mchF - microcin transport protein MchF                          |
| VFG1650 | 30.14 | (gi:14594880) iroN - IroN protein                                             |
| VFG1653 | 30.66 | (gi:28316233) iroC - ABC transport protein                                    |
| VFG1661 | 31.07 | (gi:28316241) orf38 - hypothetical protein                                    |
| VFG1668 | 45.96 | (gi:28316248) orf45 - putative lysil-tRNA synthetase LysU                     |
| VFG1669 | 37.14 | (gi:28316249) orf46 - hypothetical protein                                    |
| VFG1722 | 30.08 | (gi:26249436) c3601 - Hypothetical protein                                    |
| VFG1747 | 31.39 | (gi:16120593) YPO0256 - two-component sensor/regulator                        |
| VFG1751 | 30.33 | (gi:16120597) YPO0260 - putative AraC-family regulatory protein               |
| VFG1794 | 34.75 | (gi:15088598) ysrS - YsrS                                                     |
| VFG1797 | 36.75 | (gi:25011354) scpB - streptococcal C5a peptidase                              |
| VFG1826 | 32.27 | (gi:15609720) relA - relA                                                     |
| VFG1855 | 65.31 | (gi:52840925) htpB - Hsp60, 60K heat shock protein HtpB                       |
| VFG1859 | 32.65 | (gi:52842863) feoB - ferrous iron transporter B                               |

|         |       |                                                                                                        |
|---------|-------|--------------------------------------------------------------------------------------------------------|
| VFG1861 | 63.33 | (gi:52840449) katA - catalase/(hydro)peroxidase                                                        |
| VFG1864 | 34.87 | (gi:52841028) mip - macrophage infectivity potentiator (Mip)                                           |
| VFG1866 | 42.13 | (gi:52841515) rpoS - stationary phase specific sigma factor RpoS                                       |
| VFG1867 | 43.01 | (gi:52843161) sodB - superoxide dismutase                                                              |
| VFG1889 | 31.4  | (gi:52842852) letA - response regulator GacA                                                           |
| VFG1931 | 34.58 | (gi:15792793) cadF - outer membrane fibronectin-binding protein                                        |
| VFG1939 | 35.37 | (gi:15792463) Cj1138 - putative galactosyltransferase                                                  |
| VFG1958 | 30.12 | (gi:15792748) Cj1430c - putative nucleotide-sugar epimerase/dehydratase                                |
| VFG1965 | 30.23 | (gi:15792755) Cj1437c - putative aminotransferase                                                      |
| VFG1971 | 44.01 | (gi:15792761) kpsF - KpsF protein                                                                      |
| VFG1974 | 55.56 | (gi:15792764) kpsT - putative capsule polysaccharide export ATP-binding protein                        |
| VFG2008 | 36.43 | (gi:52842007) motB - flagellar motor protein MotB                                                      |
| VFG2059 | 41.3  | (gi:15595271) PA0073 - probable ATP-binding component of ABC transporter                               |
| VFG2064 | 42.67 | (gi:15595276) PA0078 - hypothetical protein                                                            |
| VFG2085 | 45.22 | (gi:15600888) vasH - sigma-54 dependent transcriptional regulator                                      |
| VFG2110 | 36.96 | (gi:52843027) vipD - VipB interferes with multivesicular body formation at the late endosome           |
| VFG2222 | 33.09 | (gi:17987678) manC - mannose-1-phosphate guanylyltransferase                                           |
| VFG2228 | 44.64 | (gi:17987699) wzt - O-antigen export system ATP-binding protein                                        |
| VFG2230 | 33.33 | (gi:17987701) wbkC - GDP-mannose 4,6-dehydratase / GDP-4-amino-4,6-dideoxy-D-mannose formyltransferase |
| VFG2276 | 45.65 | (gi:18309155) colA - collagenase                                                                       |
| VFG2279 | 33.33 | (gi:18310216) nagJ - hyaluronidase                                                                     |
| VFG2281 | 33.63 | (gi:18310505) nagL - hyaluronidase                                                                     |

|                         |       |                                                                                         |
|-------------------------|-------|-----------------------------------------------------------------------------------------|
| VFG2284                 | 30.6  | (gi:18309535) nanJ - exo-alpha-sialidase                                                |
| VFG2361                 | 45.95 | (gi:123443279) galE - UDP-glucose 4-epimerase                                           |
| VFG2363                 | 32.47 | (gi:123443281) manC - mannose-1-phosphate guanylyltransferase                           |
| VFG2374                 | 30.52 | (gi:123443292) prt - paratose synthase                                                  |
| VFG2376                 | 30.63 | (gi:123443294) ddhB - CDP-glucose 4,6-dehydratase                                       |
| VFG2440                 | 33.33 | (gi:53722543) bprB - two-component response regulator                                   |
| VFG2445                 | 30.67 | (gi:53722548) bapB - acyl carrier protein                                               |
| VFG2480                 | 45.52 | (gi:53722524) clpV - Clp-type ATPase chaperone protein                                  |
| VFG2526                 | 30.63 | (gi:53720911) cheB - chemotaxis-specific methylesterase                                 |
| VFG2532                 | 36.75 | (gi:53720917) cheY1 - chemotaxis two-component response regulator CheY1                 |
| VFG2538                 | 38.1  | (gi:53721911) pmlR/bspR1 - N-acylhomoserine lactone dependent regulatory protein        |
| VFG2546                 | 31.74 | (gi:53720396) wcbT - acyl-CoA transferase                                               |
| VFG2550                 | 33.94 | (gi:53720400) wcbP - capsular polysaccharide biosynthesis dehydrogenase/reductase       |
| VFG2563                 | 39.06 | (gi:53720413) wzt2 - ATP-binding ABC transporter capsular polysaccharide export protein |
| <b>accessory-genome</b> |       |                                                                                         |
| VFG0032                 | 51.79 | (gi:33591345) bplG - probable sugar transferase                                         |
| VFG0033                 | 32.31 | (gi:33591346) bplF - lipopolysaccharide biosynthesis protein                            |
| VFG0036                 | 32.6  | (gi:33591349) bplC - lipopolysaccharide biosynthesis protein                            |
| VFG0037                 | 40.79 | (gi:33591350) bplB - probable acetyltransferase                                         |
| VFG0167                 | 35.37 | (gi:15599423) pchR - transcriptional regulator PchR                                     |
| VFG0208                 | 33.01 | (gi:15596910) exsA - transcriptional regulator ExsA                                     |
| VFG0315                 | 39.2  | (gi:15644674) rfbM - mannose-6-phosphate isomerase                                      |



|         |       |                                                                                                 |
|---------|-------|-------------------------------------------------------------------------------------------------|
| VFG0364 | 32.1  | (gi:16122160) ybtA - transcriptional regulator YbtA                                             |
| VFG0365 | 35.92 | (gi:16122161) ybtP - lipoprotein inner membrane ABC-transporter                                 |
| VFG0428 | 30.92 | (gi:16763118) tviE - Vi polysaccharide biosynthesis protein TviE, Glycosyl transferases group 1 |
| VFG0564 | 33.33 | (gi:16767037) sugR - ATP binding protein                                                        |
| VFG0574 | 33.54 | (gi:16767047) mgtB - Mg <sup>2+</sup> transport protein                                         |
| VFG0596 | 40    | (gi:16764454) copR - Copper resistance; transcriptional regulatory protein                      |
| VFG0660 | 41.18 | (gi:24114260) yeeS - intergenic-region protein                                                  |
| VFG0780 | 30.36 | (gi:11527916) orf7 - unknown                                                                    |
| VFG0864 | 36.73 | (gi:471302) aggR - AraC homologous regulator of AAF/I                                           |
| VFG0869 | 33.33 | (gi:34148232) aatC - AatC ATB binding protein of ABC transporter                                |
| VFG0917 | 33.6  | (gi:26250130) chuA - Outer membrane heme/hemoglobin receptor                                    |
| VFG0934 | 34.12 | (gi:26246575) entA - 2,3-dihydro-2,3-dihydroxybenzoate dehydrogenase                            |
| VFG1028 | 30.39 | (gi:15808708) intI1 - Tn21 integrase IntI1                                                      |
| VFG1030 | 30.69 | (gi:15808710) tnpR - resolvase TnpR                                                             |
| VFG1038 | 35.87 | (gi:15808718) tetD - putative transcriptional regulator TetD                                    |
| VFG1066 | 35.85 | (gi:15808746) orf50 - unknown                                                                   |
| VFG1074 | 31.97 | (gi:15808754) orf58 - IS1328 transposase                                                        |
| VFG1085 | 35.71 | (gi:14626628) iutA - iutA                                                                       |
| VFG1100 | 36.26 | (gi:15641770) VC1767 - conserved hypothetical protein                                           |
| VFG1234 | 30.38 | (gi:15595613) chpD - probable transcriptional regulator                                         |
| VFG1267 | 32.6  | (gi:15599419) pchH - probable ATP-binding component of ABC transporter                          |
| VFG1301 | 63.82 | (gi:21281857) cap8E - capsular polysaccharide synthesis enzyme Cap8E                            |
| VFG1341 | 30.91 | (gi:22537322) cpsJ - glycosyl transferase CpsJ(V)                                               |

|         |       |                                                                               |
|---------|-------|-------------------------------------------------------------------------------|
| VFG1342 | 36.76 | (gi:22537323) cpsO - glycosyl transferase CpsO(V)                             |
| VFG1344 | 39.91 | (gi:22537325) cpsM - polysaccharide biosynthesis protein CpsM(V)              |
| VFG1348 | 41.5  | (gi:22537329) cpsE - glycosyl transferase CpsE                                |
| VFG1372 | 37.33 | (gi:15900282) cps4H - capsular polysaccharide biosynthesis protein Cps4H      |
| VFG1388 | 36.27 | (gi:15608039) ompA - ompA                                                     |
| VFG1389 | 31.07 | (gi:15608043) prrA - hypothetical protein Rv0903c                             |
| VFG1456 | 31.75 | (gi:24527988) ORF5 - hypothetical protein                                     |
| VFG1473 | 32.8  | (gi:24528005) ORF22 - hypothetical protein                                    |
| VFG1486 | 35.09 | (gi:24528017) ORF35 - putative CS12 fimbrial-like upstream regulatory protein |
| VFG1511 | 57.72 | (gi:24528040) ORF60 - putative integrase                                      |
| VFG1512 | 33.16 | (gi:24528041) ORF61 - putative reverse transcriptase                          |
| VFG1539 | 30.85 | (gi:23954223) hek - adhesin/virulence factor Hek                              |
| VFG1569 | 48.89 | (gi:23954253) orf35 - hypothetical protein                                    |
| VFG1583 | 31.52 | (gi:23954266) orf49 - hypothetical protein                                    |
| VFG1633 | 66.67 | (gi:14594867) mchF - microcin transport protein MchF                          |
| VFG1650 | 30.34 | (gi:14594880) iroN - IroN protein                                             |
| VFG1706 | 38.62 | (gi:26249410) c3575 - Transposase insF for insertion sequence IS3A/B/C/D/E/fA |
| VFG1731 | 31.33 | (gi:26249445) c3610 - Putative receptor                                       |
| VFG1746 | 42.59 | (gi:16120592) YPO0255 - putative two-component response regulator             |
| VFG1922 | 31.52 | (gi:15792655) ptmA - putative oxidoreductase (flagellin modification)         |
| VFG1931 | 41.59 | (gi:15792793) cadF - outer membrane fibronectin-binding protein               |
| VFG1936 | 38.49 | (gi:15792460) Cj1135 - putative two-domain glycosyltransferase                |
| VFG1937 | 37.21 | (gi:15792461) Cj1136 - putative galactosyltransferase                         |
| VFG1938 | 34.17 | (gi:15792462) Cj1137c - hypothetical protein Cj1137c                          |

|         |       |                                                                 |
|---------|-------|-----------------------------------------------------------------|
| VFG1939 | 39.33 | (gi:15792463) Cj1138 - putative galactosyltransferase           |
| VFG1947 | 38.61 | (gi:15792471) waaV - putative glucosyltransferase               |
| VFG1956 | 47.31 | (gi:15792746) fcl - putative fucose synthetase                  |
| VFG1968 | 37.5  | (gi:15792758) Cj1440c - putative sugar transferase              |
| VFG2027 | 33.96 | (gi:15792474) waaE - putative ADP-heptose synthase              |
| VFG2044 | 36.67 | (gi:33592926) bvgA - virulence factors transcription regulator  |
| VFG2225 | 67.14 | (gi:17987696) gmd - GDP-mannose 4,6-dehydratase                 |
| VFG2226 | 35.5  | (gi:17987697) per - perosamine synthetase                       |
| VFG2228 | 39.15 | (gi:17987699) wzt - O-antigen export system ATP-binding protein |
| VFG2284 | 30.6  | (gi:18309535) nanJ - exo-alpha-sialidase                        |
| VFG2343 | 33.55 | (gi:123442779) flgJ - flagellar protein FlgJ                    |
| VFG2366 | 30.16 | (gi:123443284) rfpB - putative galactosyltransferase            |
| VFG2368 | 35.14 | (gi:123443286) wbcG - putative glycosyltransferase              |
| VFG2373 | 31.97 | (gi:123443291) wbcC - putative glycosyltransferase              |
| VFG2464 | 37.21 | (gi:53722567) bsaN - AraC family transcriptional regulator      |
| VFG2546 | 31.59 | (gi:53720396) wcbT - acyl-CoA transferase                       |
